# Supplementary material for: A Polymorphic Gene within the Mycobacterium smegmatis esx1 Locus Determines Mycobacterial Self-Identity and Conjugal Compatibility
Source: PubMed Central journal article supplement (PMC9040860; doi:10.1128/mbio.00213-22), 2022-03-17

JxM1

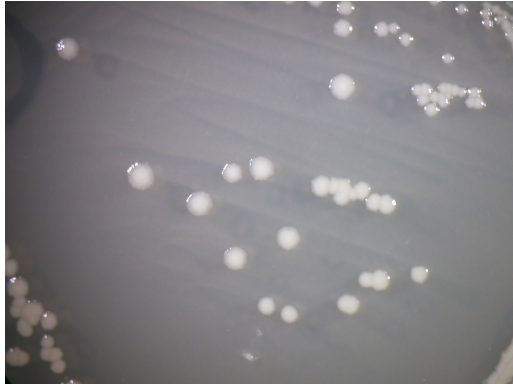

JxM4

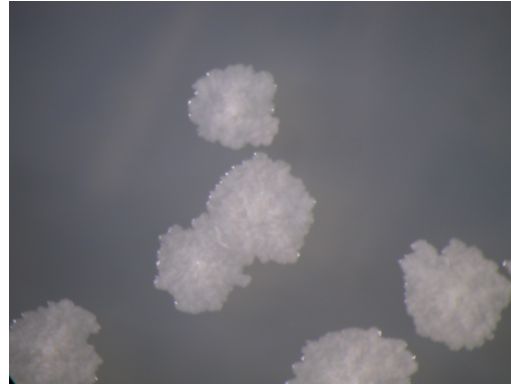

JxM2

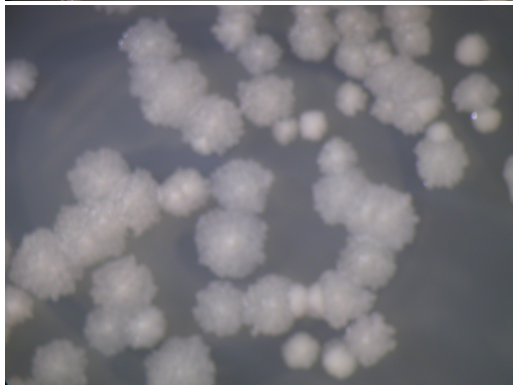

JxM6

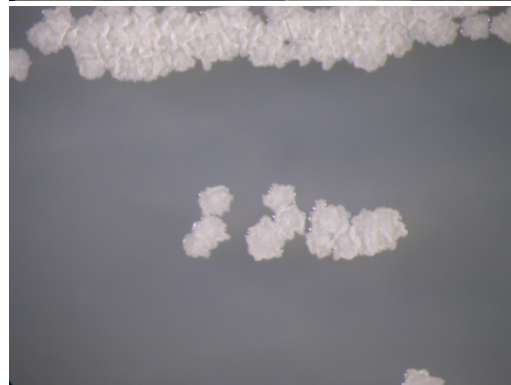

JxM3

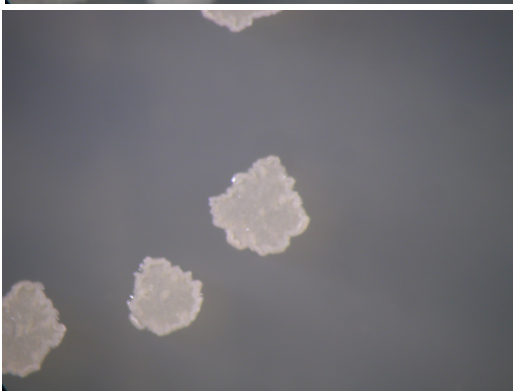

JxM8

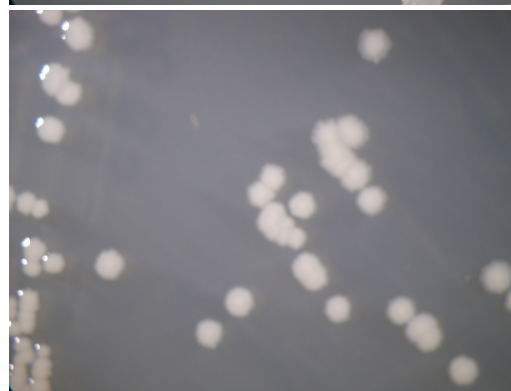

Supplement: mbio.00213-22-sf001.pdf [file mbio.00213-22-sf001.pdf]
