# Supplementary material for: A Polymorphic Gene within the Mycobacterium smegmatis esx1 Locus Determines Mycobacterial Self-Identity and Conjugal Compatibility
Source: PubMed Central journal article supplement (PMC9040860; doi:10.1128/mbio.00213-22), 2022-03-17
Supplement: mbio.00213-22-sf002.pdf [file mbio.00213-22-sf002.pdf]

1

|              |            |            |            |            |             |            |           |
|--------------|------------|------------|------------|------------|-------------|------------|-----------|
| MKD8         | MTTPPGPE-- | -----LPPPH | OGGF-----  | -----      | -----YSAG   | HHPORPWPET | PP-PKTRGG |
| Rabinowitchi | MTLPPPPNTP | PPNGASPPPP | FGGS-----  | -----      | -----GPYP   | QSLHQPWPOQ | PS-PRRSGT |
| mc2155       | MTLPPPPGSF | G-----OQPP | LGGHSGGGSP | ESWPOYPGGP | TSPPPAAGPPP | WGPOQOWANG | PTPPNNGGK |
| Jucho        | MTLPPPPGSF | G-----OQPP | LGGHSGGGSP | ESWPOYPGGP | TSPPPAAGPPP | WGPOQOWANG | PTPPNNGGK |
| Nishi        | -----      | -----      | -----      | -----      | -----       | -----      | -----     |

71

|              |             |            |            |            |             |            |            |
|--------------|-------------|------------|------------|------------|-------------|------------|------------|
| MKD8         | VKWMIGAVAL  | LAVVGVTVAV | TLA--VTGKD | KRDAIPPGSG | VSGSPTASDI  | A SADDSGPV | SVITEDPTCA |
| Rabinowitchi | WKVWLAIIVAL | LAVVGVTAAV | TVT--VTGEP | TGGGLPSAST | POAVPSDSEI  | A SAEDSGGV | SVITDDPTCA |
| mc2155       | VRWMLGGLAV  | V--LAIALAV | VVTVLVVRPD | AENG---SKD | EKTGGPASGF  | A SENDDGPV | SIITDDPTCD |
| Jucho        | VRWMLGGLAV  | V--LAIALAV | VVTVLVVRPD | AENG---SKD | EKTGGPASGF  | A SENDDGPV | SIITDDPTCD |
| Nishi        | MNLPPIRVSV  | TLAIALAVAV | AVAVLVVRSV | GEDR-----  | -----PSESAY | A SAGDTDPV | NLITEEPTCA |

141

|              |            |            |             |            |            |            |            |
|--------------|------------|------------|-------------|------------|------------|------------|------------|
| MKD8         | AQGPILETFA | AQQ-SQLWVE | RDPALGRESW  | SPELRADYEK | VG KAMRTAA | DQVAQLAKIT | PHRAMRELYE |
| Rabinowitchi | PQRPIVSTLA | AKT-NAGWDK | RDPPEVPASDW | TPEIRAQYNE | VA AAMRDAA | DQFVQLAKLT | PHRVMREIYE |
| mc2155       | GWARITREYN | AESTAVRWAE | RDASIPANAW  | TPEQRDMYNT | MA KAMTTAA | DHTEALIKQT | PHRAMRELYQ |
| Jucho        | GWARITREYN | AESTAVRWAE | RDASIPANAW  | TPEQRDMYNT | MA KAMTTAA | DHTEALIKQT | PHRAMRELYQ |
| Nishi        | PWMSVVEEFT | REAAAVNWQG | RRADVPAASAW | TPAERATYDT | VG KAMARMA | DRAPKFAQOT | PHRVMREPYE |

211

|              |            |            |            |            |            |             |            |
|--------------|------------|------------|------------|------------|------------|-------------|------------|
| MKD8         | QFIAYARAYA | DNIPNYTPPT | DNLARVAVTA | ADA ISYICA | AVSYGSAAAR | APLVENRPAP  | TNVAPLGNPS |
| Rabinowitchi | QFIAYARAYA | ASVPNYTPGD | DYSARFAVGA | AEA ISRICA | AIDYGSAGAR | APLVKVVSEPP | AEIAPVGDAN |
| mc2155       | QFSAYVHVVF | PLIPAYVPEN | NRFPVPINAL | ANS ATDICT | AIEFRSASTF | AGRIPSVDP   | SRLASTSGAD |
| Jucho        | QFSAYVHVVF | PLIPAYVPEN | NRFPVPINAL | ANS ATDICT | AIEFRSASTF | AGRIPSVDP   | SRLASTSGAD |
| Nishi        | QMVAYTRAFV | DRIPTVVPED | NKLLSASSAA | GSS ISNICG | AIAYGTARDV | TPLLAAPVP   | ADPVTPOEYS |

281

|              |            |            |            |             |             |            |            |
|--------------|------------|------------|------------|-------------|-------------|------------|------------|
| MKD8         | EPERFLTAPN | PVCGEWSSVL | NAFQ TDTTE | WLKTDPDISS  | SQWSIEQKQI  | NENVIPIMKR | FANQLYLLGK |
| Rabinowitchi | APVRFSLSEP | AVCRDWNLAL | MQFQ DETAE | WRNTDPKIPA  | GEWTPEQKRL  | NVEVAPVMRR | FATQLRSLGN |
| mc2155       | ASDLFLGDGN | PVCADLASAV | VAFD EQTRA | WQALDPKLLPA | AEWSPDHRVAV | MDDVAPVMSA | NADNLERLGR |
| Jucho        | ASDLFLGDGN | PVCADLASAV | VAFD EQTRA | WQALDPKLLPA | AEWSPDHRVAV | MDDVAPVMSA | NADNLERLGR |
| Nishi        | EPETLVTSQN | PACPDWSAEA | DEFS AKSAD | WLATSKRVPVA | AEWTPQOKAV  | HETVAPMMAA | NADKLEQLGR |

351

|              |            |            |            |            |            |        |
|--------------|------------|------------|------------|------------|------------|--------|
| MKD8         | DSGNPTFRDI | ADLSV QYRL | AYVAAIPTYT | PADKYLANS  | IRLATMANVA | CRAAAD |
| Rabinowitchi | SSGNPVLADF | ANLSA QYRS | ALEKALPTYV | PADDYLAGVS | ARLNGMVNSA | CQAVSA |
| mc2155       | ASDNAIVEDF | TVLAA QYQR | GYVEAIPYYS | SADNVLWQVV | ASLVKAVNSG | CKAS-- |
| Jucho        | ASDNAIVEDF | TVLAA QYQR | GYVEAIPYYS | SADNVLWQVV | ASLVKAVNSG | CKAS-- |
| Nishi        | QSGDPVLEDV | AALQR STDG | PSSSHCPTTR | A-PTGCWRPR | RRNW----SG | -----  |
